# Supplementary material for: Enantioselective total synthesis of pteridic acid A
Source: Royal Society of Chemistry journal article supplement (doi:10.1039/b416309e), 2005-01-01

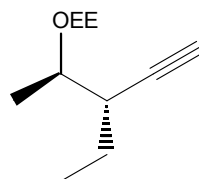

**5**

(300 MHz, CDCl<sub>3</sub>)

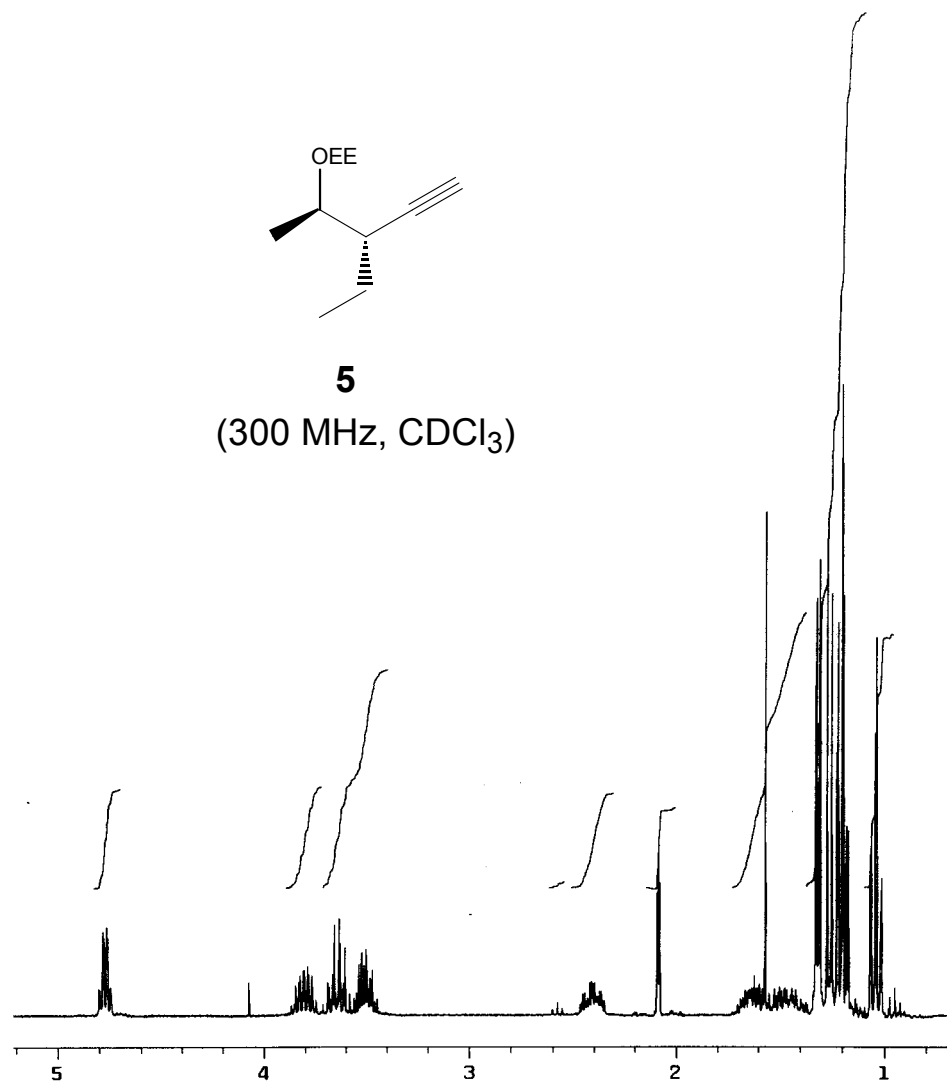

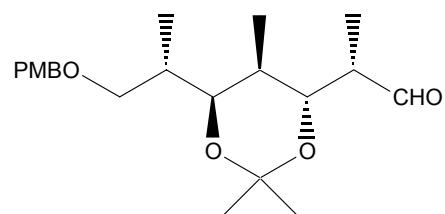

**9**

(300 MHz, CDCl<sub>3</sub>)

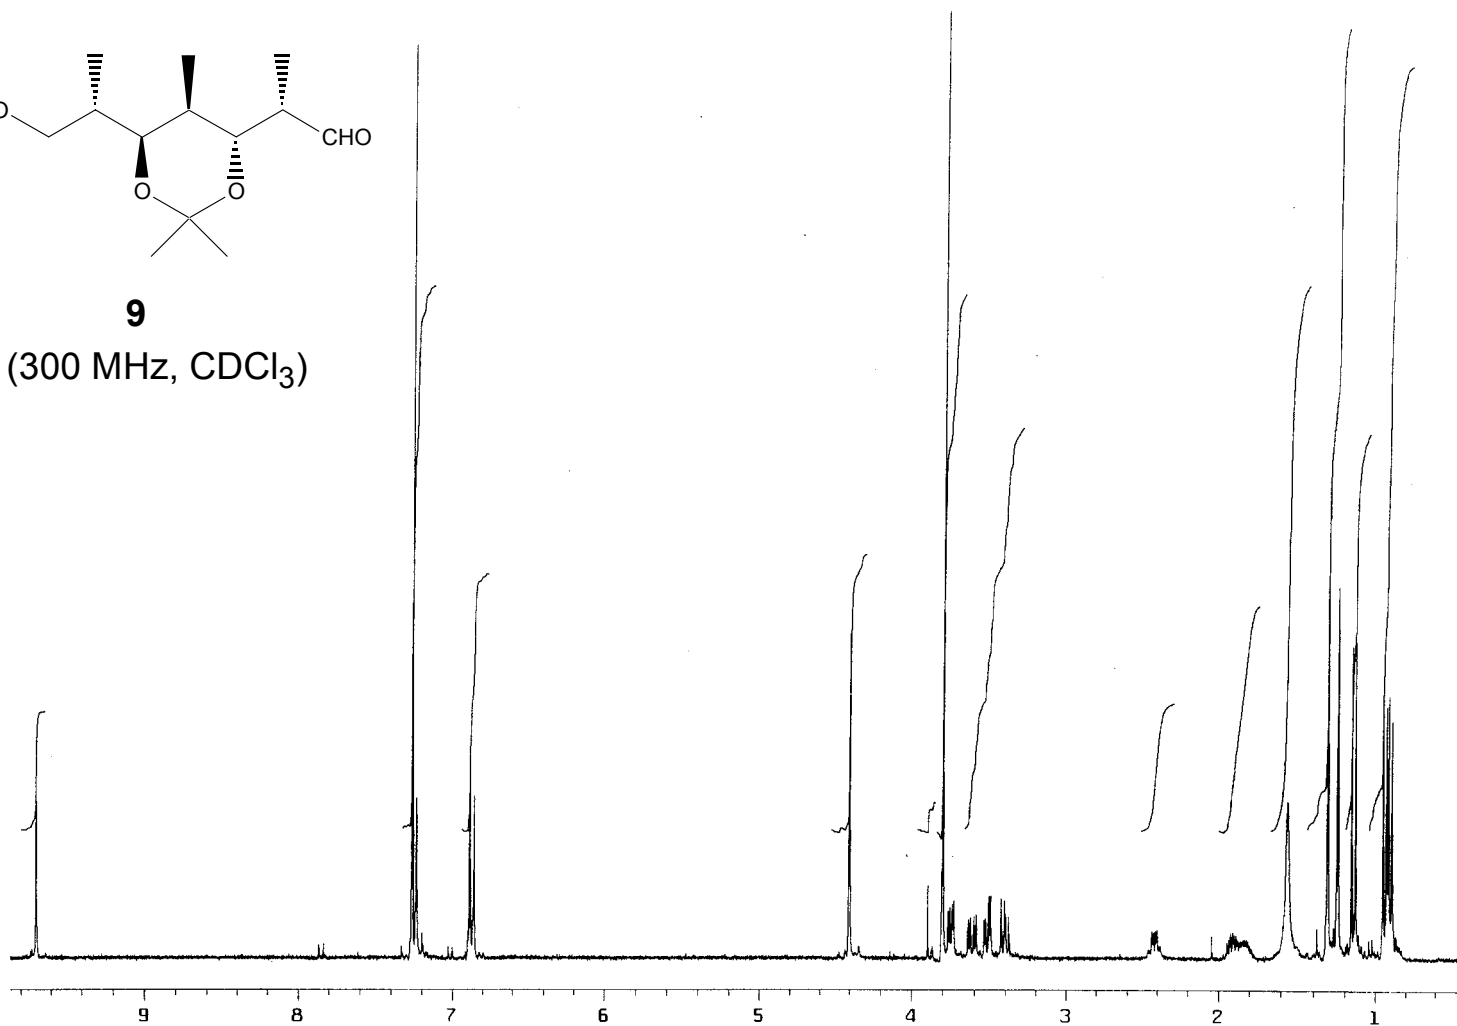

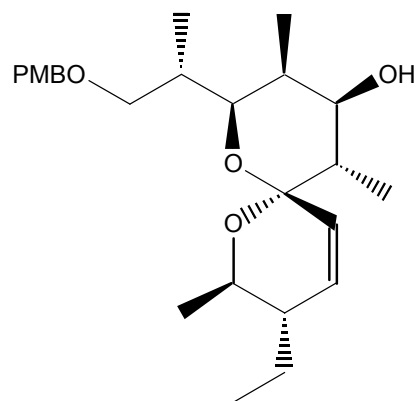

**14a**  
(300 MHz, CDCl<sub>3</sub>)

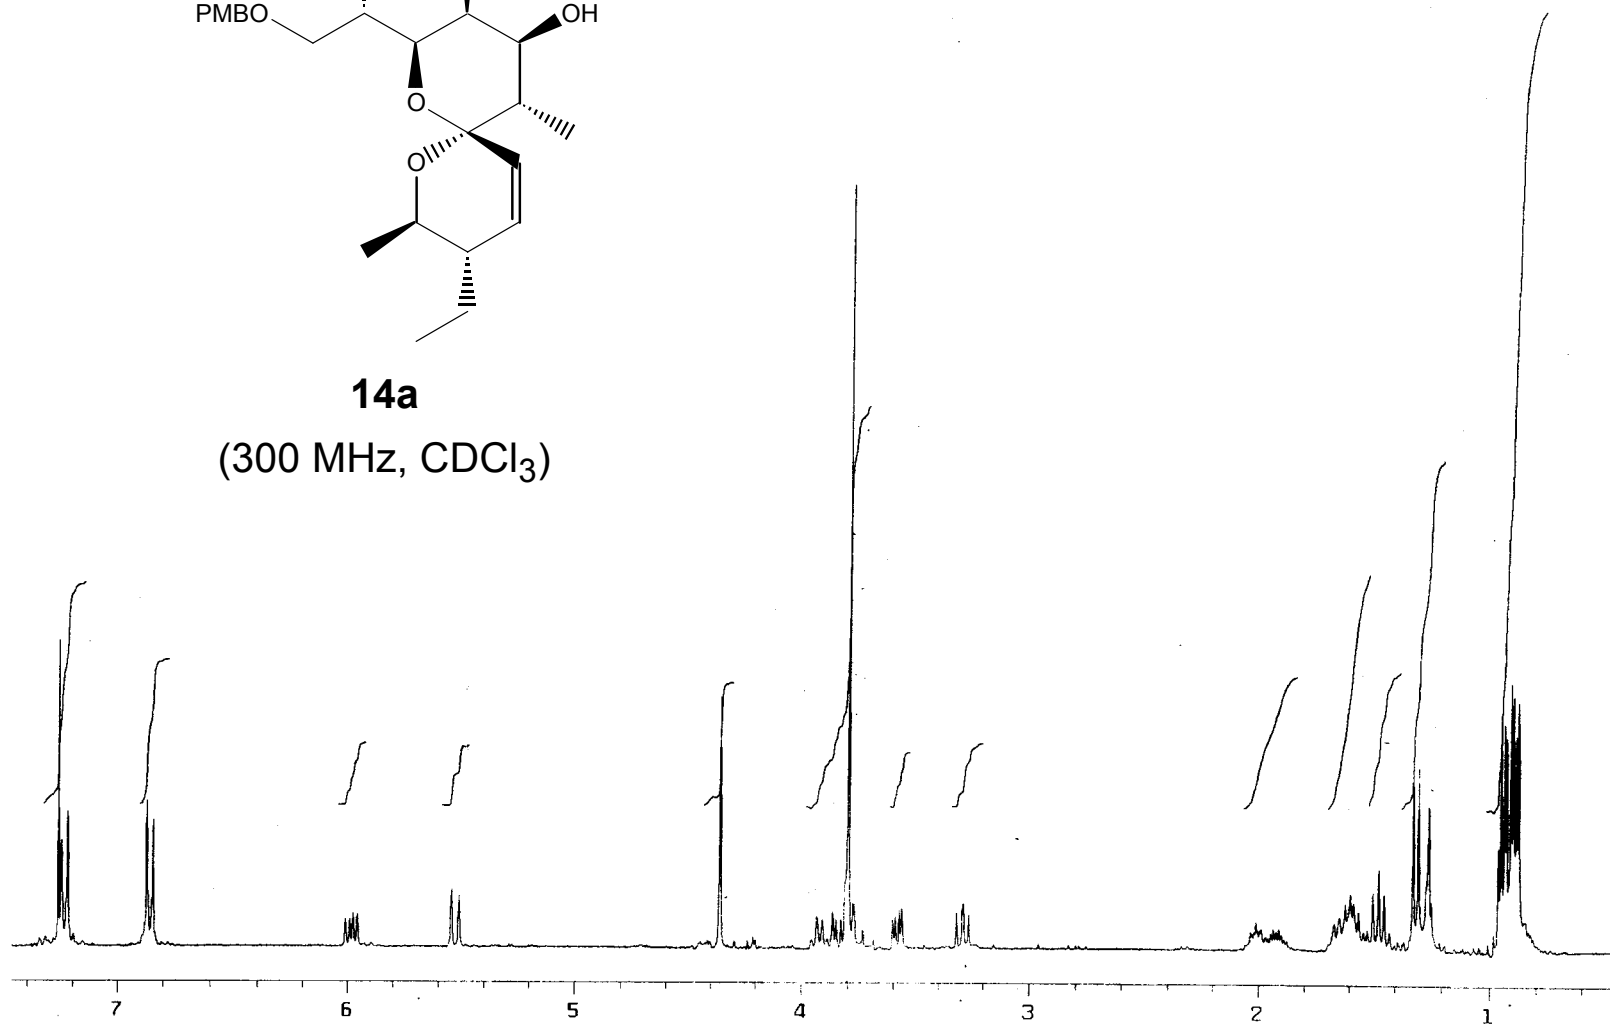

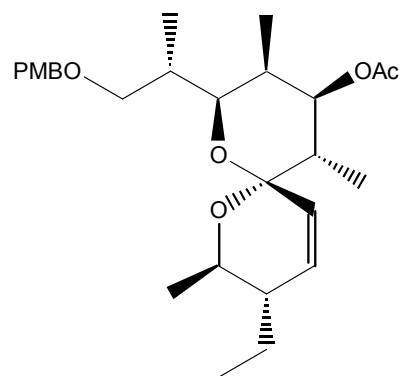

**14b**  
(300 MHz, CDCl<sub>3</sub>)

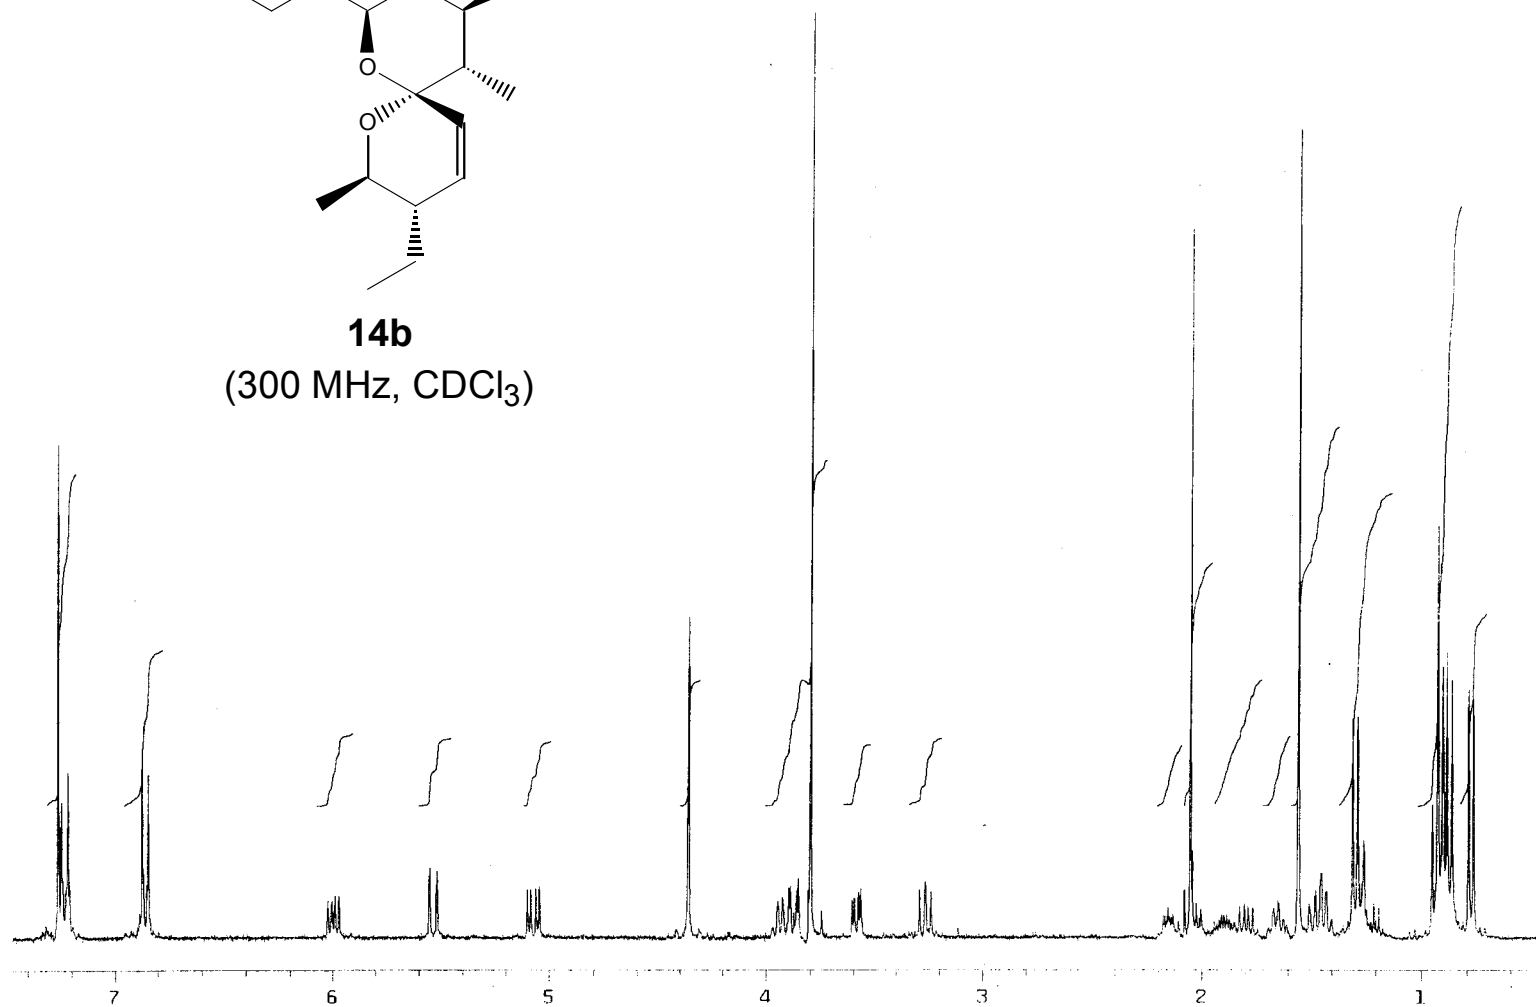

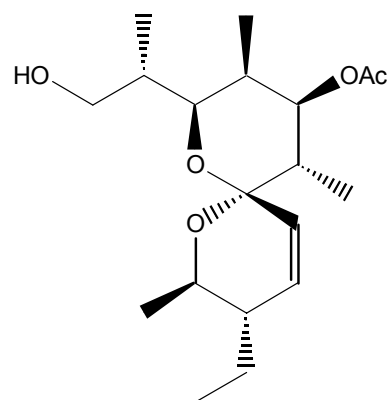

**14c**

(300 MHz, CDCl<sub>3</sub>)

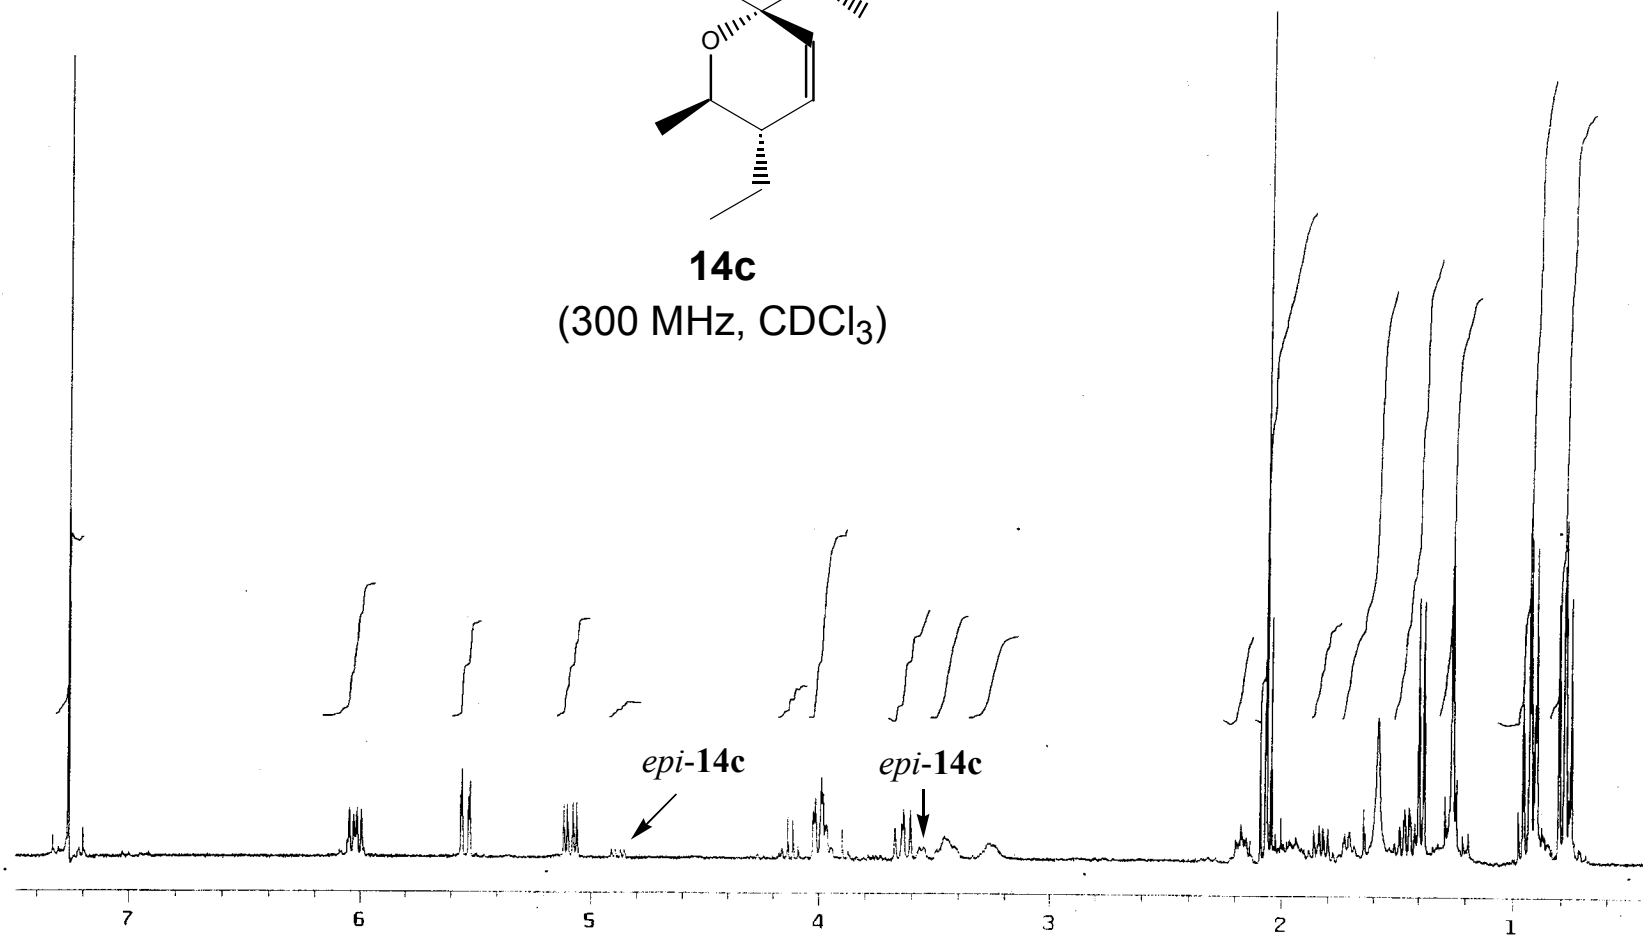

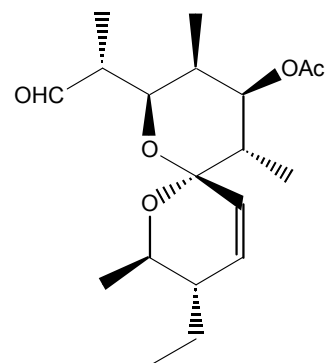

**15a**  
(300 MHz, CDCl<sub>3</sub>)

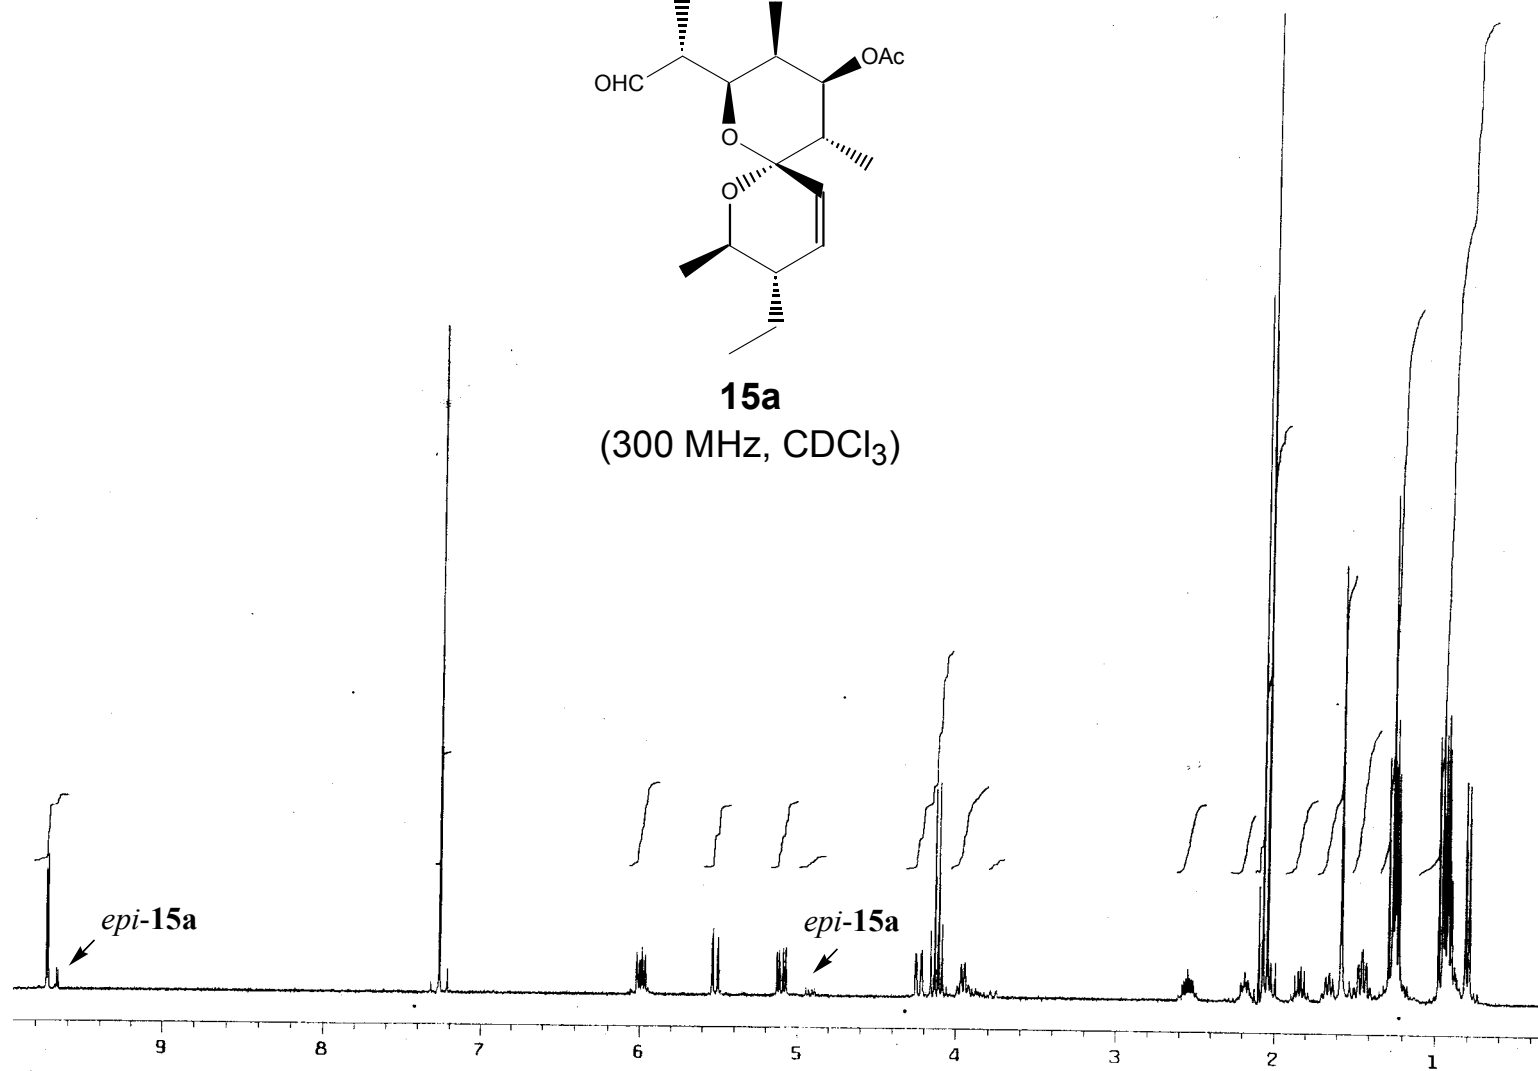

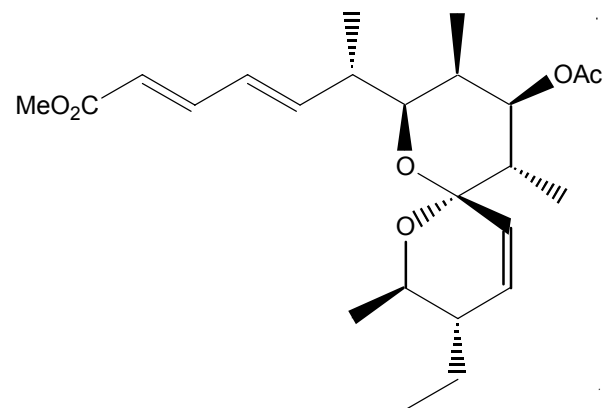

**15b**  
(300 MHz, CDCl<sub>3</sub>)

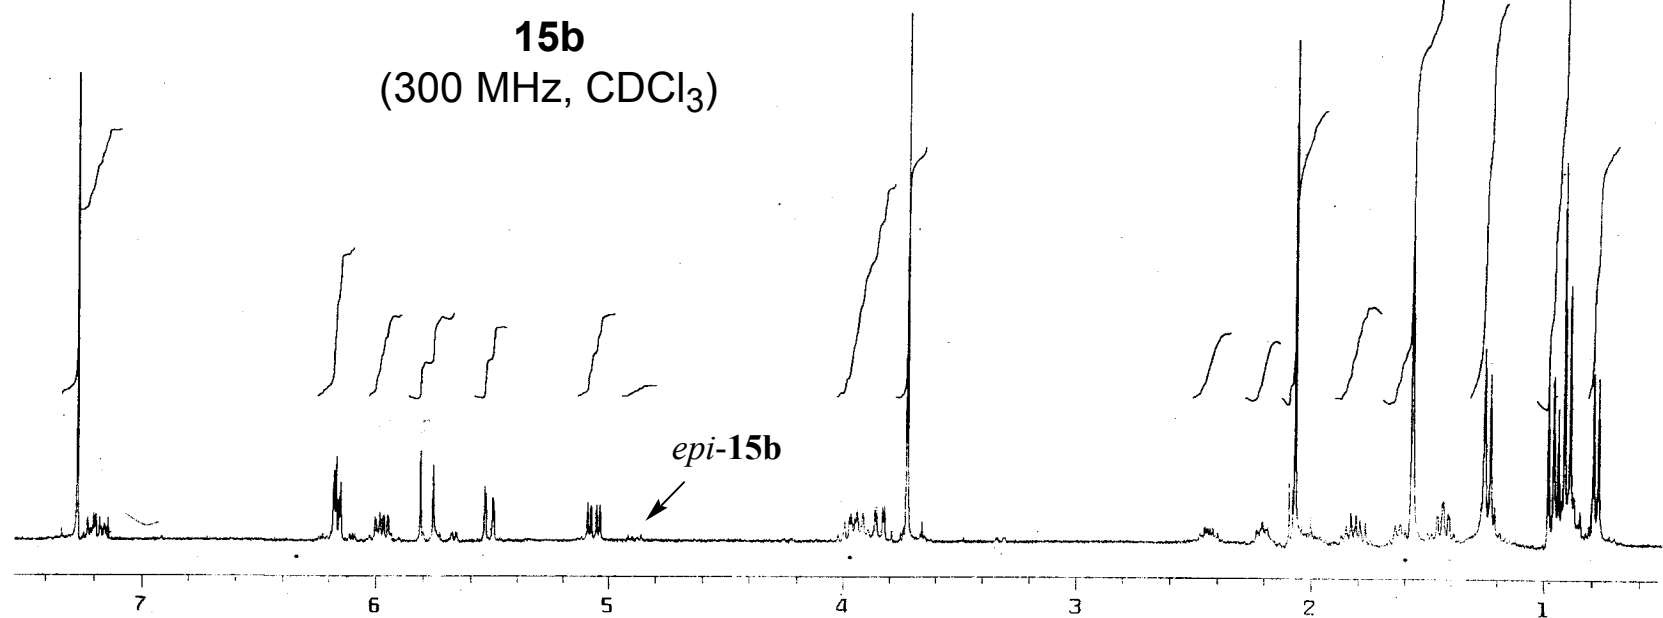

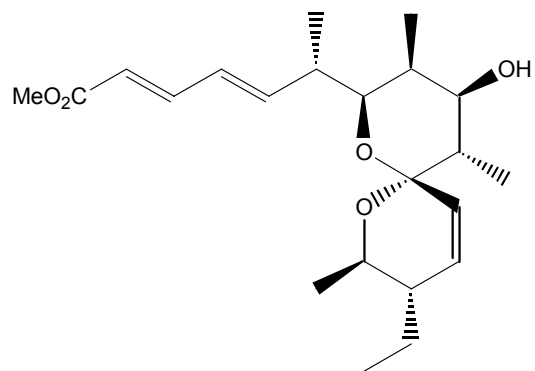

**15c**  
(600 MHz, CDCl<sub>3</sub>)

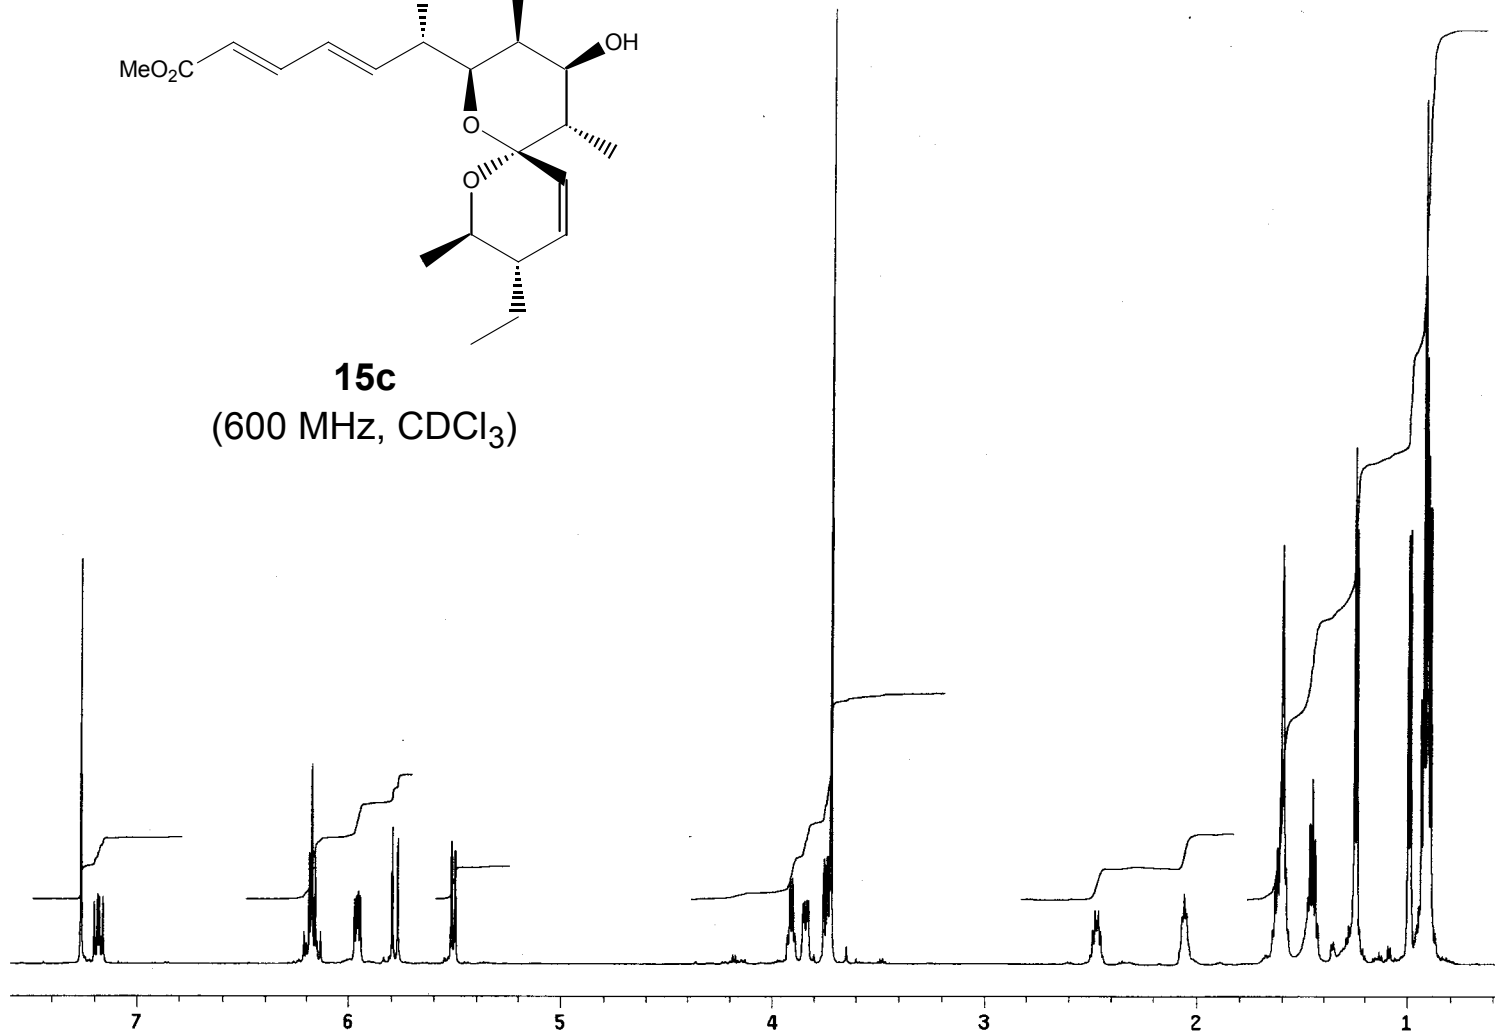



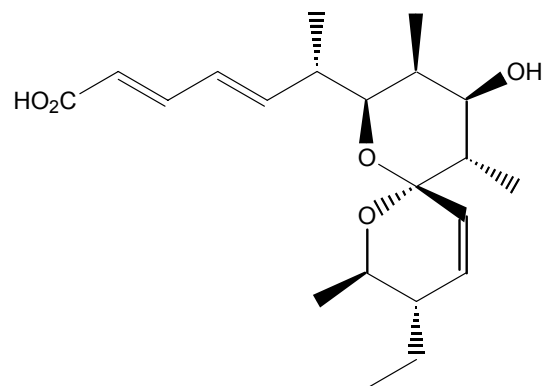

**1**

(500 MHz, CDCl<sub>3</sub>)

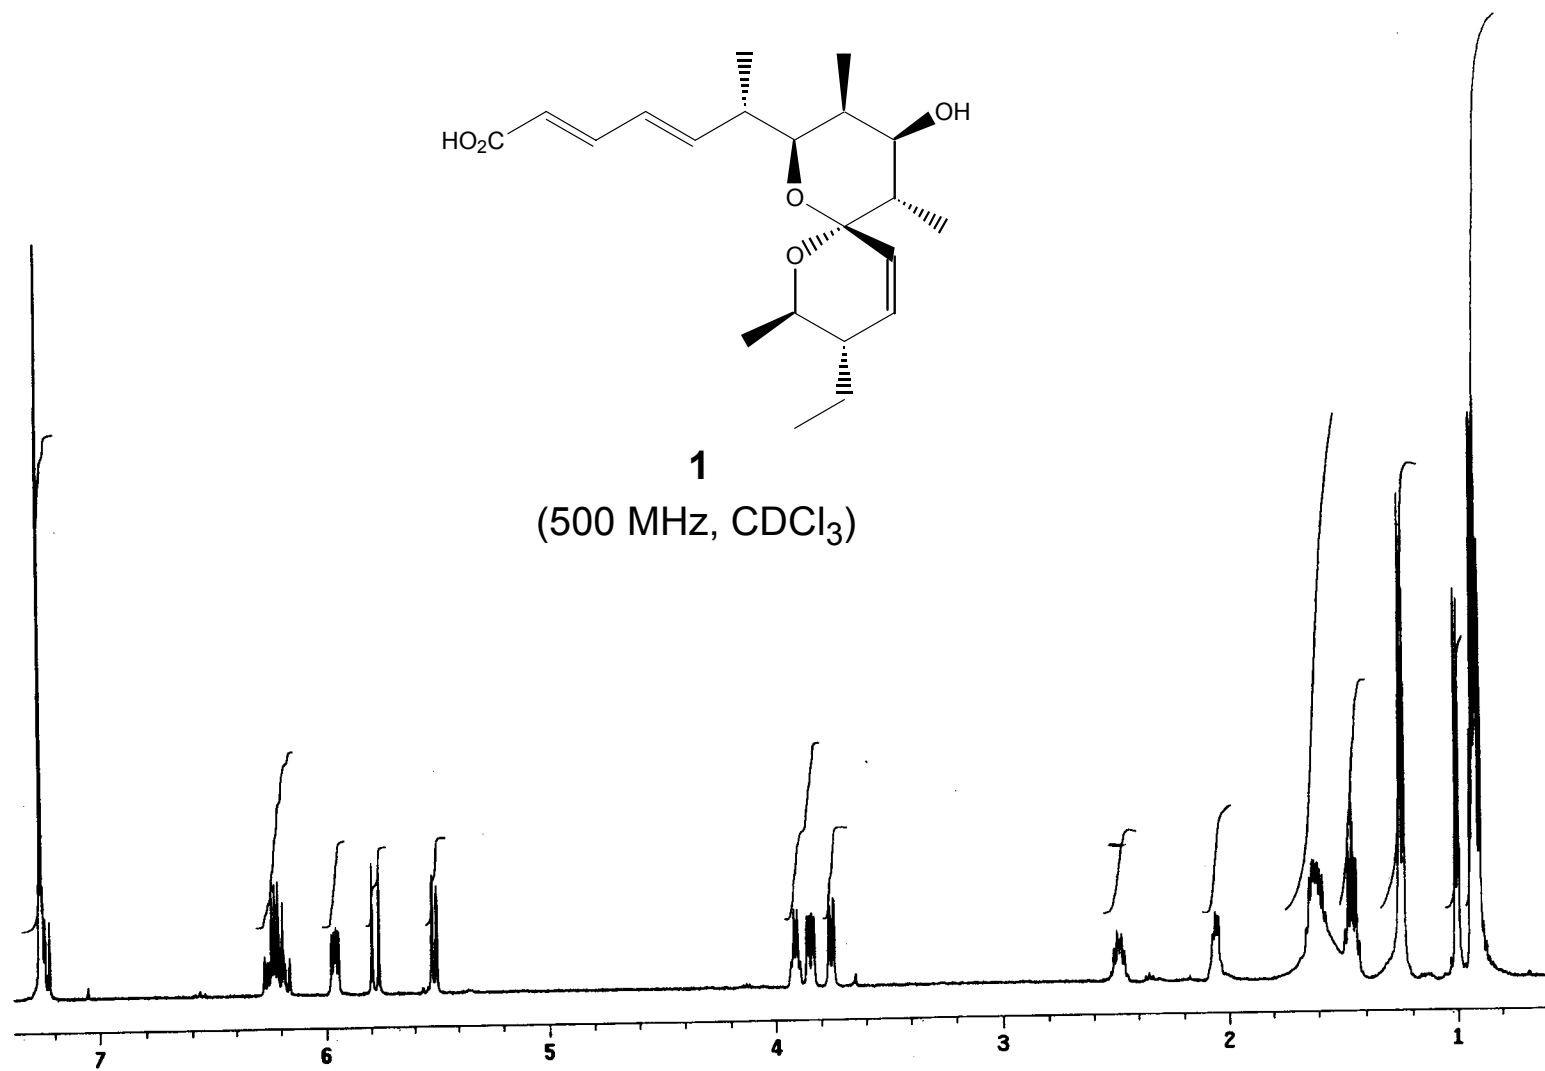

Supplement: b416309e.pdf [file b416309e.pdf]
